# Supplementary material
Source: MDPI journal article supplement (https://www.mdpi.com/2311-7524/9/2/188)
Supplement: s1 [file s1]

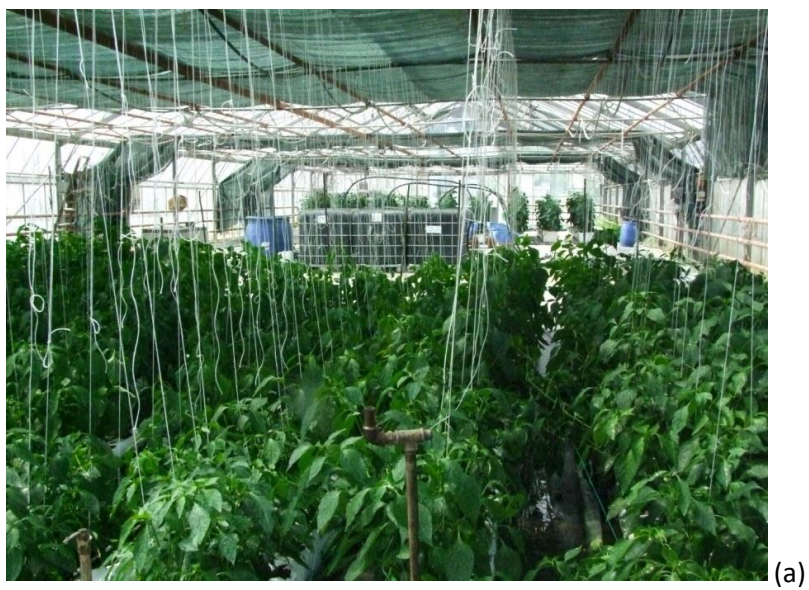

(a)

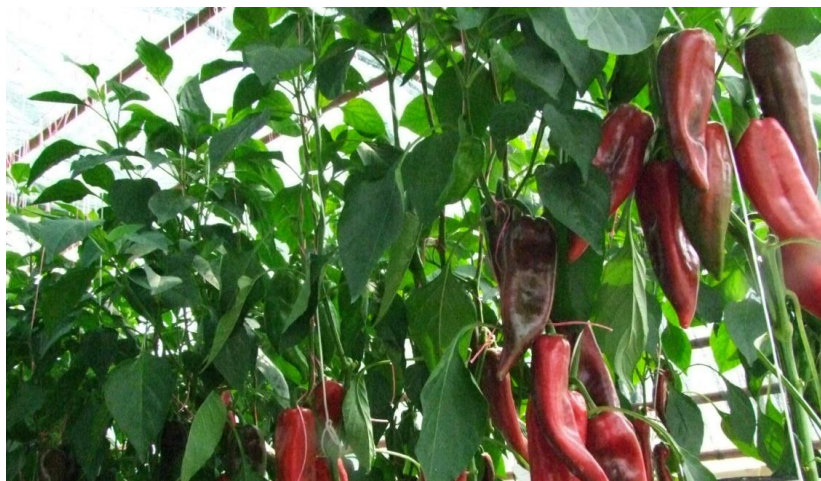

(b)

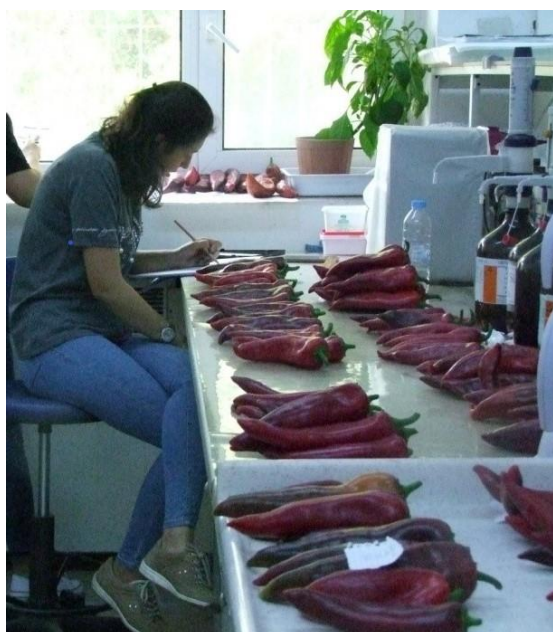

(c)

Figure S1. Views of the capia red peppers on the plants in greenhouse (a and b) and harvested in the lab for fruit analysis (c)
